# Supplementary material for: Unexpected refacetting of palladium nanoparticles under atmospheric N2 conditions
Source: Royal Society of Chemistry journal article supplement (doi:10.1039/c8cc04574g), 2018-01-01
Supplement: c8cc04574g2.pdf [file c8cc04574g2.pdf]

## Electronic Supplementary Information (ESI)

### Unexpected Refacetting of Palladium Nanoparticles under Atmospheric N<sub>2</sub>

#### Condition

Xun Zhang,<sup>‡</sup><sup>a</sup> Jun Meng,<sup>‡</sup><sup>bc</sup> Beien Zhu,<sup>\*b</sup> Wentao Yuan,<sup>a</sup> Hangsheng Yang,<sup>a</sup> Ze Zhang,<sup>a</sup> Yi Gao<sup>\*b</sup> and Yong Wang<sup>\*a</sup>

<sup>a</sup> State Key Laboratory of Silicon Materials and Center of Electron Microscopy, School of Materials Science and Engineering, Zhejiang University, Hangzhou 310027, China

<sup>b</sup> Division of Interfacial Water and Key Laboratory of Interfacial Physics and Technology, Shanghai Institute of Applied Physics, Chinese Academy of Sciences, Shanghai 201800, China

<sup>c</sup> University of Chinese Academy of Sciences, Beijing 100049, China

<sup>‡</sup>These two authors contributed equally to this work.

#### Corresponding Authors:

yongwang@zju.edu.cn

zhubeien@sinap.ac.cn

gaoyi@sinap.ac.cn

#### Contents of Supplementary Information:

|                                        |     |
|----------------------------------------|-----|
| <i>1. Materials and Methods</i>        | S2  |
| 1-1. Preparation of Pd Nanoparticles   | S2  |
| 1-2. In situ TEM Characterizations     | S2  |
| 1-3. Computational details             | S3  |
| <i>2. Supporting Figures and Table</i> | S3  |
| <i>3. References</i>                   | S11 |
| <i>4. Caption for Movie</i>            | S11 |

---

# 1. Materials and Methods

## 1-1. Preparation of Pd Nanoparticles

Pd NPs were synthesized and dispersed in water. 57 mg of  $\text{Na}_2\text{PdCl}_4$  (Aladdin) precursors were reduced in 11 ml aqueous solution, which contained 60 mg of L-ascorbic acid. (AA, Sinopharm Chemical Reagent Co. Ltd.) To control the particle size and morphologies, 105 mg of poly (vinyl pyrrolidone) (PVP,  $M_w \approx 55\,000$ , Aldrich) and 600 mg of KBr (Sinopharm Chemical Reagent Co. Ltd.) were mixed into the solution beforehand, serving as the stabilizer and capping agent respectively.<sup>[1]</sup> After heating at 80 °C for 3 hours, the products were washed over 5 times by centrifugal cleaning and collected. Eventually, the Pd NPs were drop-casted onto a heating chip with  $\text{SiN}_x$  film and annealed in air at 200 °C for 30 min. We confirm that the Pd NPs were not oxidized from the TEM observations. The TEM image of the acquired Pd NPs is displayed in Fig. S1, showing NPs ranging from 15 nm to 50 nm with irregular shapes.

## 1-2. In situ TEM Characterizations

*In situ* observations were carried out in a field emission TEM (Titan 60-300, FEI company), operating at 300 kV. The gas cell holder (Climate S3, DENSSolutions Company) and its gas supply system make our experiments available under atmospheric pressure environment. The holder was designed by MEMS-based micro-chips.<sup>[2]</sup> It contains a nanoreactor composed of two chips functionalized with 30 nm thick electron-transparent  $\text{SiN}_x$  windows. Molybdenum (Mo) spiral under the  $\text{SiN}_x$  membrane is chosen as the heating module and conducting materials on heating chip. The prepared rounded Pd NPs were studied both in vacuum and in 1 bar  $\text{N}_2$  (99.999%) at 200 °C.

### 1-3. Computational Details

The (4×4) and the (1×1) slab models are built for each facet to calculate the adsorption energy of a single gas molecule and the lateral interaction between the adsorbates. The (4×4) slab model is a supercell which contains 16 unit cells (16 surface atoms). It is used to simulate the situation of very low adsorption coverage. The (1×1) slab model is a unit cell which contains only one surface atom. We use it to simulate the case of maximum adsorption coverage of gas molecule.

## 2. Supporting Figures and Table

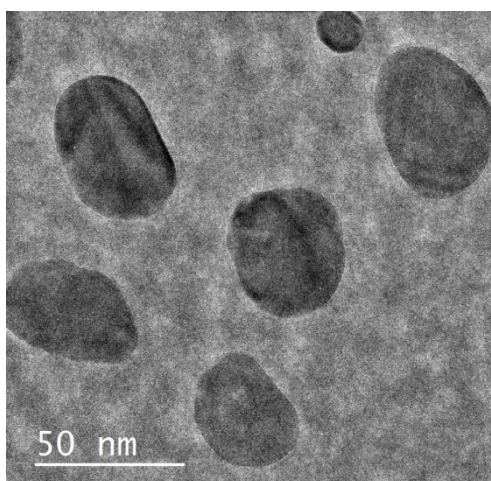

**Fig. S1** TEM image of the as prepared Pd NPs showing irregular shapes. The particle sizes change from 15 nm to 50 nm.

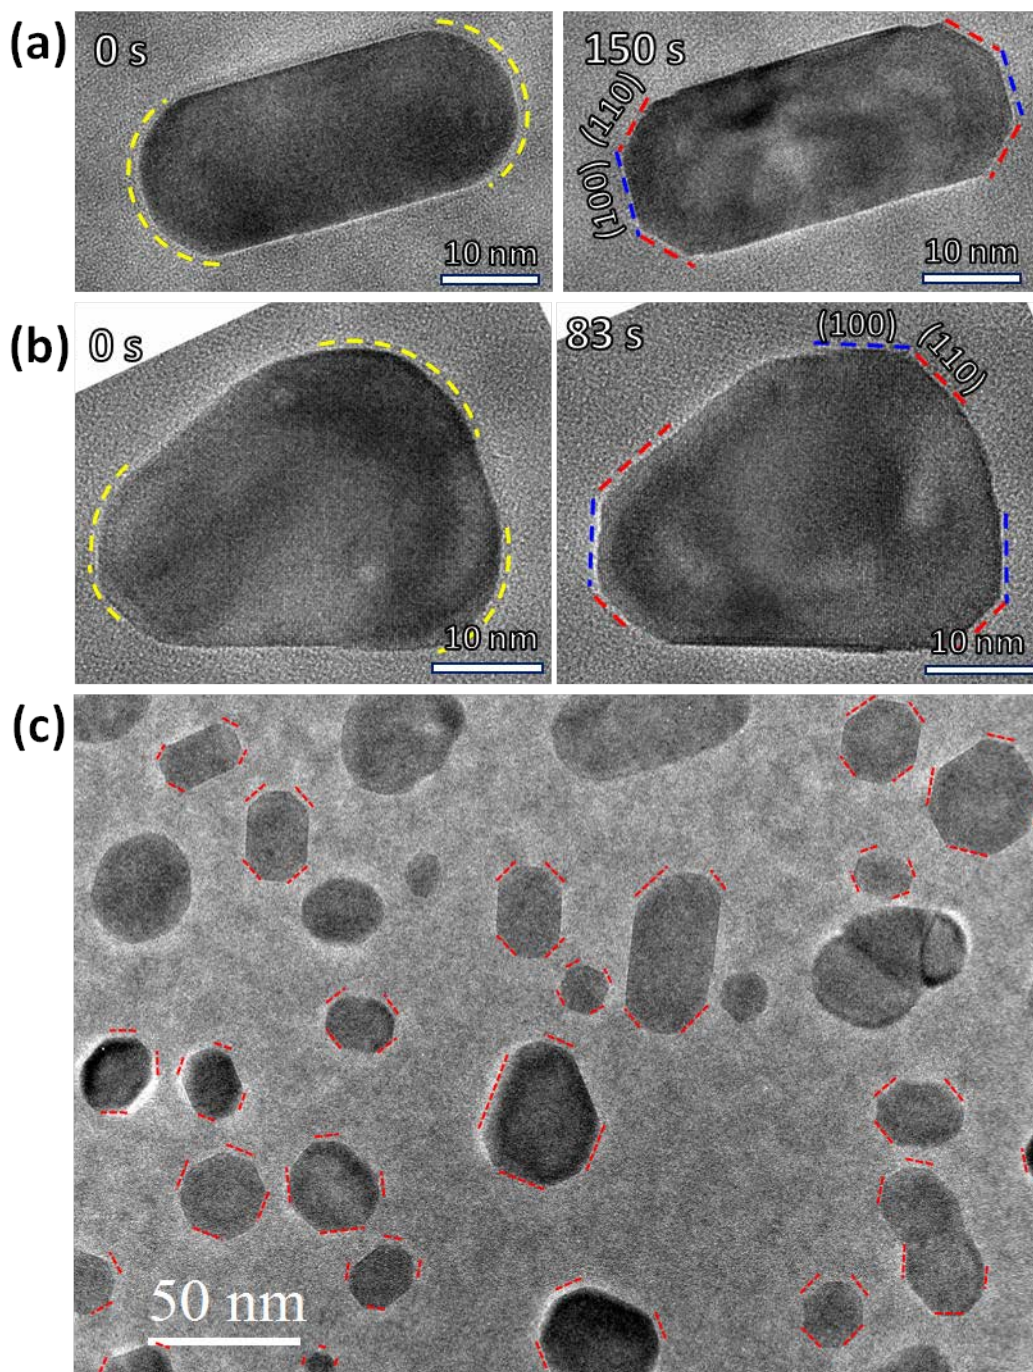

**Fig. S2** (a, b) Other examples of Pd surface refacetting when exposed to 1 bar N<sub>2</sub> at 200 °C. (c) TEM image of Pd NPs under 1 bar N<sub>2</sub> at 200 °C indicates that the refacetting process occur homogeneously on nearly all the particles. The red lines correspond to Pd {110} facets.

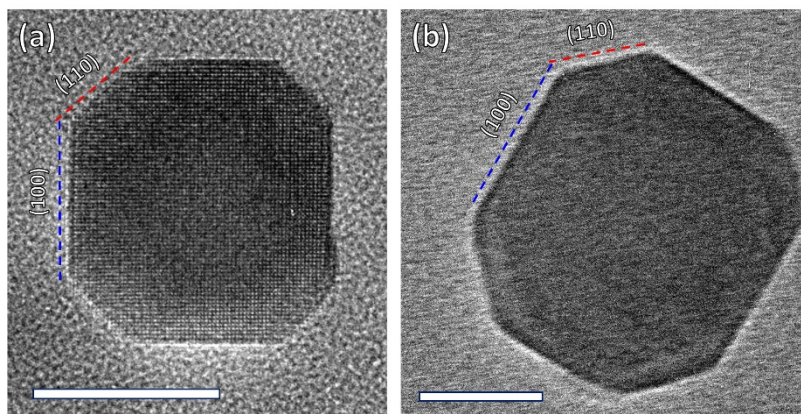

**Fig. S3** TEM images show the snapshots of two refaceted Pd NPs under 1 bar  $N_2$  at 200 °C, which was not exposed to electron beam irradiation before. It indicated that the electron beam is not an essential requirement for the refacetting. Scale bar: 10 nm.



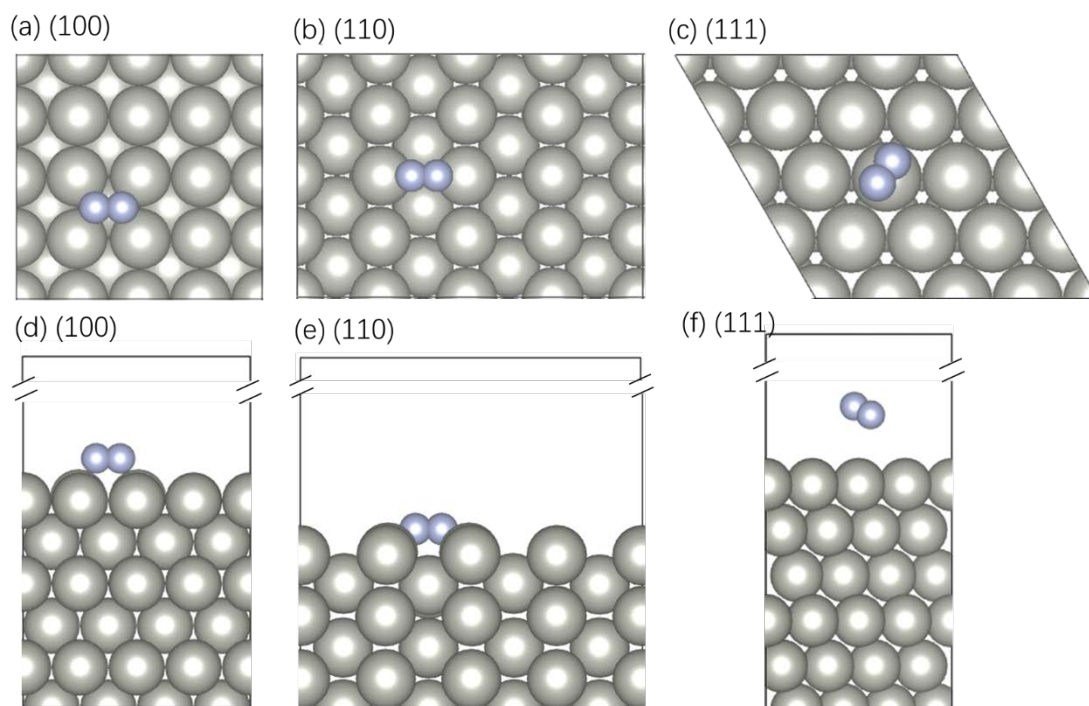

**Fig. S4** The most stable adsorption configurations of the  $N_2$  on the  $(4 \times 4)$  slab models Pd (100), (110), and (111) facets from the top view (a-c) and the side view (d-f). The grey ball represents Pd and the blue ball represents N.

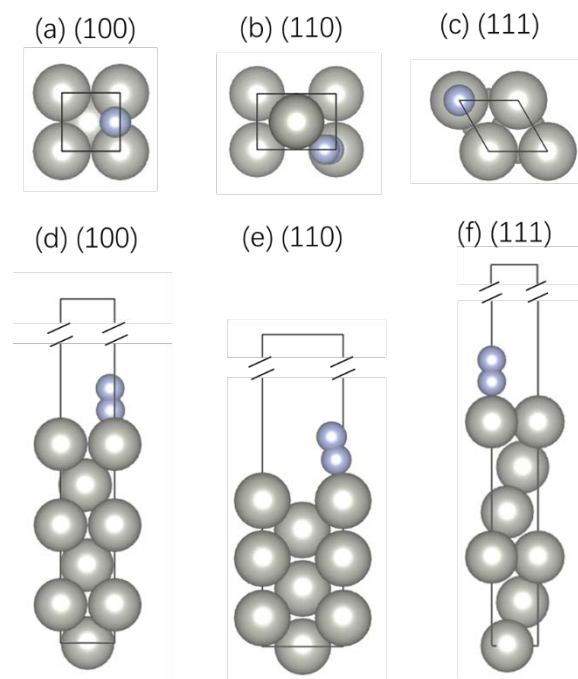

**Fig. S5** The most stable adsorption configurations of the  $N_2$  on the (1 $\times$ 1) slab models of Pd (100), (110), and (111) facet from the top view (a-c) and the side view (d-f). The grey ball represents Pd and the blue ball represents N.

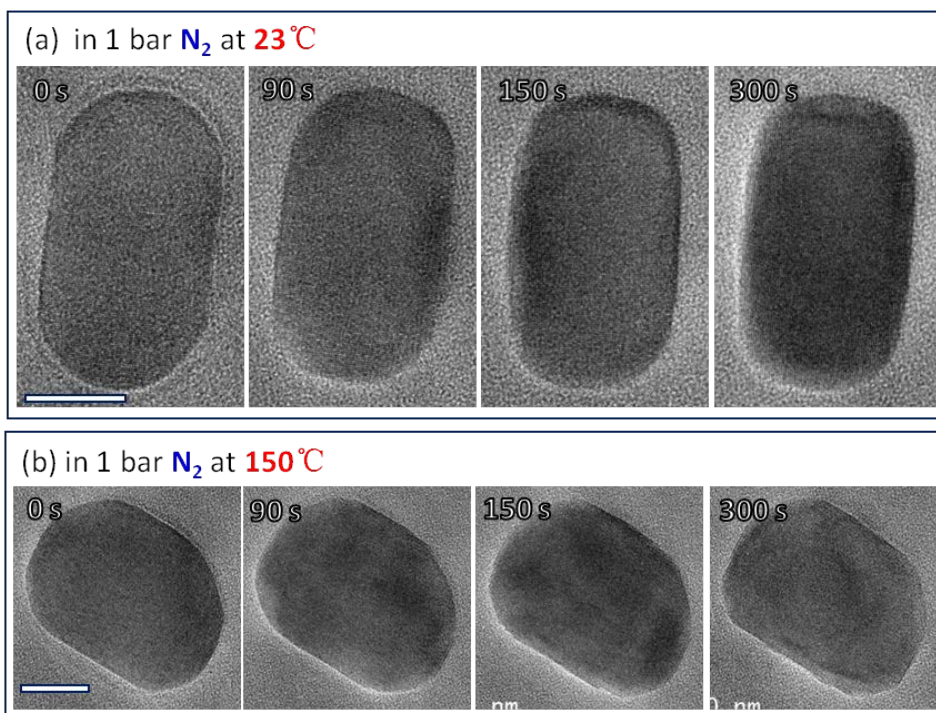

**Fig. S6** When the as prepared Pd NPs were heated in 1 bar  $N_2$  at  $23^\circ C$  and at  $150^\circ C$ , no obvious refacetting of the NPs could be observed. Scale bar: 10 nm.



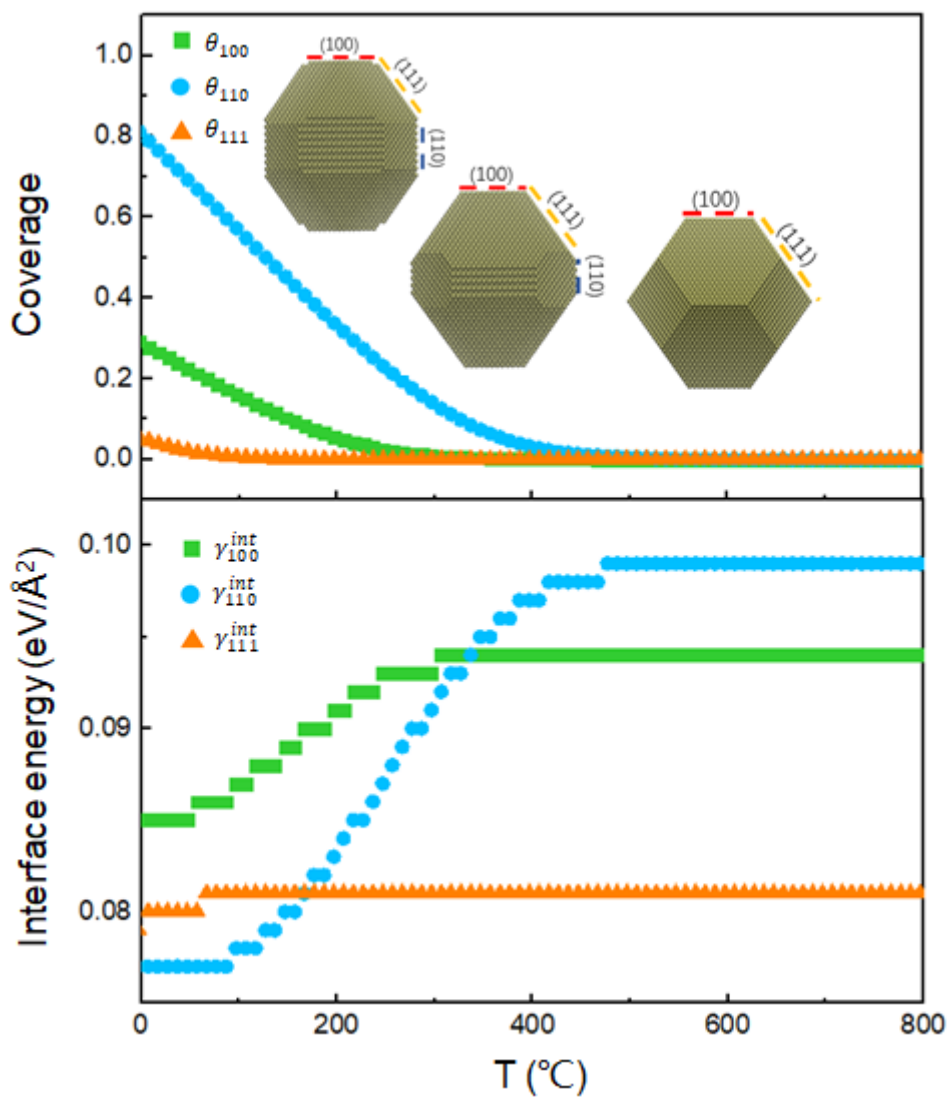

Fig. S7. Theoretical calculated  $N_2$  adsorption coverage and Pd interface energy at 1bar  $N_2$  pressure and at different temperature. The insert images show the predicted structure evolution when temperature changes from low to high.

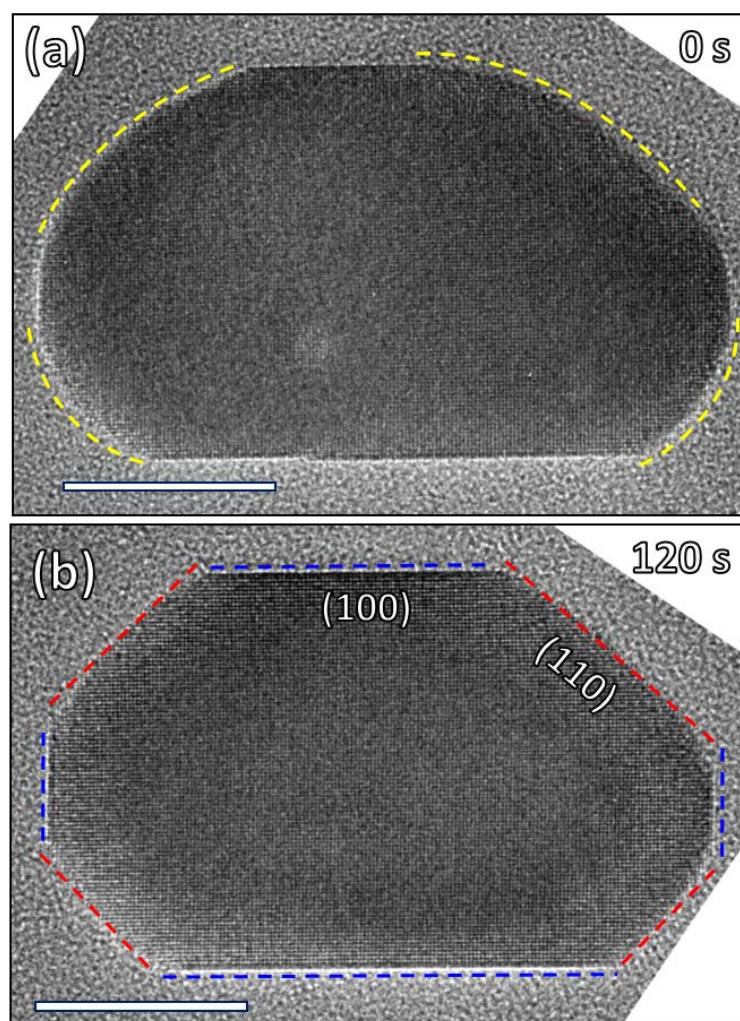

**Fig. S8** (a, b) Time resolved TEM images showing Pd surface refaceting when exposed to 1 bar N<sub>2</sub> at 300 °C.

**Table S1** The adsorption energies of Ar on the Pd (100), (110), and (111) facets.

| Facet          | Pd(100) | Pd(110) | Pd(111) |
|----------------|---------|---------|---------|
| $E_{ads}$ (eV) | -0.01   | 0.00    | -0.01   |

### 3. References

[1] M. Jin, H. Liu, H. Zhang, Z. Xie, J. Liu and Y. Xia, *Nano Res.*, 2011, **4**, 83.

[2] J. F. Creemer, S. Helveg, G. H. Hoveling, S. Ullmann, A. M. Molenbroek, P. M. Sarro and H. W. Zandbergen, *Ultramicroscopy*, 2008, **108**, 993.

### 4. Caption for Movie

**Movie S1.** The *in situ* shape evolution of two of the Pd NPs at 200 °C in 1 bar N<sub>2</sub> projected along the [001] direction (4 times faster).
